# Supplementary material for: Ca2+-permeable AMPA receptors in mouse olfactory bulb astrocytes
Source: PubMed Central journal article supplement (PMC5359673; doi:10.1038/srep44817), 2017-03-21
Supplement: srep44817-s1.pdf [file srep44817-s1.pdf]

## **Ca<sup>2+</sup>-permeable AMPA receptors in mouse olfactory bulb astrocytes**

Damian Droste, Gerald Seifert, Laura Seddar, Oliver Jädtker, Christian Steinhäuser, Christian Lohr

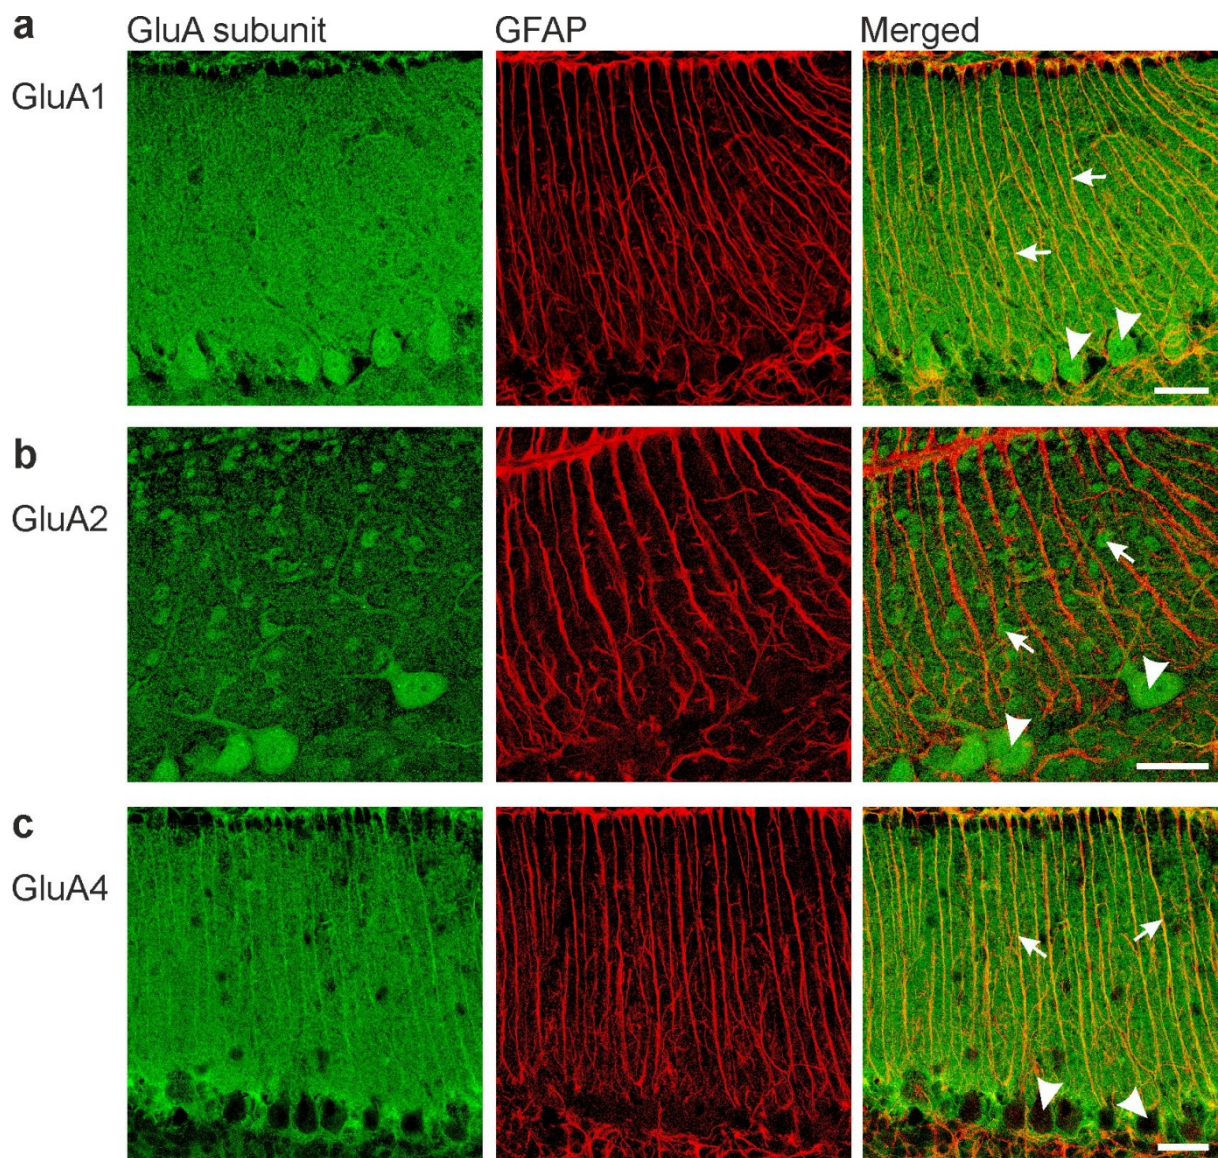

**Supplementary Fig. S1.** Antibody staining of cerebellar tissue. **a)** GluA1 antibodies (green) labeled Purkinje cells (arrowheads) and Bergmann glial cells (arrows). **b)** GluA2 immunoreactivity was detected in Purkinje cells (arrowheads) and interneurons (arrows). **c)** GluA4 immunoreactivity was detected in Bergmann glial cells (arrows), whereas Purkinje cells were not labeled (arrowheads). Scale bars: 20  $\mu\text{m}$ .
